# Supplementary material for: Visible-light controlled catalytic Cu2O–Au micromotors
Source: Royal Society of Chemistry journal article supplement (doi:10.1039/c6nr08088j), 2016-11-28
Supplement: c6nr08088j1.pdf [file c6nr08088j1.pdf]

## Supporting Information

### Visible-light Controlled Catalytic Cu<sub>2</sub>O-Au Micromotors

Dekai Zhou<sup>†,2</sup>, Yuguang C. Li<sup>†</sup>, Pengtao Xu<sup>1</sup>, Nicholas S. McCool<sup>1</sup>, Longqiu Li<sup>\*2</sup>, Wei Wang<sup>3</sup>, Thomas E. Mallouk<sup>\*1</sup>

1. Departments of Chemistry, Biochemistry and Molecular Biology, and Physics, The Pennsylvania State University, University Park PA 16802

2. School of Mechatronics Engineering, Harbin Institute of Technology, Harbin 150001, China

3. School of Materials Science and Engineering, Harbin Institute of Technology, Shenzhen Graduate School, Shenzhen, Guangdong 518055, China

\*Corresponding Authors:

longqiuli@hit.edu.cn, tem5@psu.edu

† These authors contributed equally to this work

### Supporting Videos

Video S-1. One Cu<sub>2</sub>O-Au micromotor moving towards Au side in 2.5% H<sub>2</sub>O<sub>2</sub>.

Video S-2. Brownian motion of a Cu<sub>2</sub>O micromotor under visible light in 2.5% H<sub>2</sub>O<sub>2</sub>.

Video S-3. Motion of a Cu<sub>2</sub>O-Au micromotor under visible light in 2.5% H<sub>2</sub>O<sub>2</sub> with 5mM NaNO<sub>3</sub>.

Video S-4. Visible light triggered “Stop and Go” of a Cu<sub>2</sub>O-Au micromotor in 2.5% H<sub>2</sub>O<sub>2</sub>.

### Supporting Figures

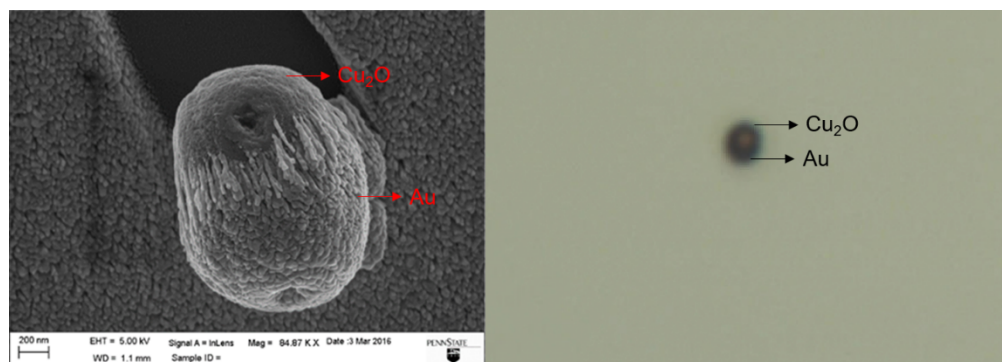

**Fig S1.** Au-Cu<sub>2</sub>O micromotor with 200 nm Au sputtered onto a Cu<sub>2</sub>O sphere. For typical Au-Cu<sub>2</sub>O micromotors, 30 nm of Au was coated onto the Cu<sub>2</sub>O microparticles. The shadowing of the particle in the angled Au deposition is evident in the SEM image.

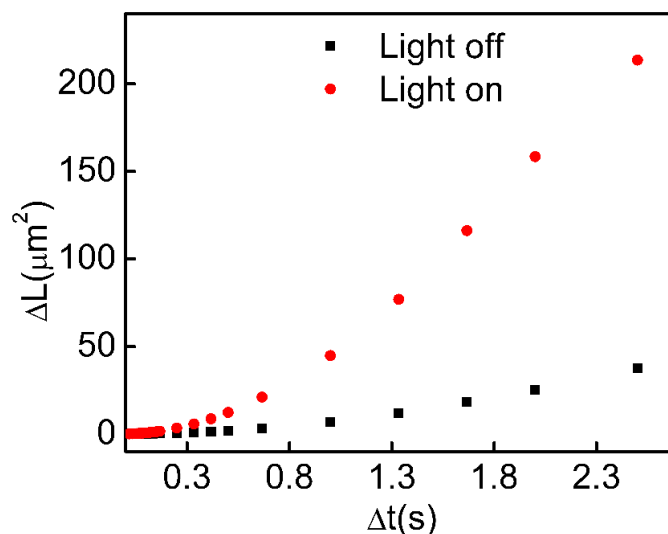

**Fig S2.** MSD of Au-Cu<sub>2</sub>O micromotors with and without illumination (see Video S-4).

## Experimental

### Micromotor Synthesis and Characterizations

Cu<sub>2</sub>O microspheres were prepared based on a previously reported method.<sup>36</sup> In a typical synthesis, 1 g of copper acetate (ACS Reagent, >98%) was dissolved in 40 mL of deionized water (18.2 MΩ-cm) and mixed with 40 mL of absolute ethanol at 70 °C with stirring. Then, 1.4 g of sodium hydroxide (ACS Reagent, >97%) and 1.2 g of glucose (Sigma, 99.5%) were added to the solution; the solution was heated for another 30 min at 70 °C and then allowed to cool to room temperature. The precipitate was collected by centrifugation at 3000 rpm for 5 min and washed with deionized water and ethanol three times each. The precipitate was collected and then further dried in vacuum for 1 h. 0.1 g of the Cu<sub>2</sub>O microspheres was re-dispersed in 1 mL ethanol and drop-cast onto a glass slide to form a monolayer of Cu<sub>2</sub>O spheres. The spheres were subsequently coated with 30 nm of gold by using a Kurt J Lesker Lab-18 E-gun thermal evaporator. The final Cu<sub>2</sub>O-Au micromotors were sonicated and collected in water for motility experiments.

### Materials characterization

The morphology and elemental composition of the Cu<sub>2</sub>O particles and the Cu<sub>2</sub>O-Au micromotors were characterized by FEI NanoSEM 630 scanning electron microscopy and energy dispersive X-ray spectroscopy. X-ray powder diffraction patterns of the Cu<sub>2</sub>O particles were recorded on a PANalytical XPert Pro diffractometer. UV-vis diffuse-reflectance spectra of the Cu<sub>2</sub>O samples on glass slides were measured by using a Perkin-Elmer Lambda 950 spectrometer.

### Optical Imaging and Tracking

The motion of the Cu<sub>2</sub>O-Au micromotors was tracked by using video spot tracker V08.11 software. Motors were tracked for 30 s and mean square displacements (MSD) were calculated at different light intensities and H<sub>2</sub>O<sub>2</sub> concentrations. All speeds were calculated by averaging the instantaneous speeds of 30 different micromotors.

### Electrochemical Experiments

Tafel experiments were measured in a two-electrode configuration with either a Cu<sub>2</sub>O electrode or Au electrode against an Ag/AgCl reference electrode under light and dark conditions. The Cu<sub>2</sub>O electrode was made by drop casting Cu<sub>2</sub>O particles on a FTO glass; the Au electrode was made by Au vacuum deposition onto FTO glass (Q150R Rotary-Pumped Sputter Coater). An Ag/AgCl electrode was used as both counter and reference electrode in the Tafel experiments since only small amount of current was passed. 2.5 v% H<sub>2</sub>O<sub>2</sub> solution were used as the electrolyte without any other supporting electrolyte, similar to the optical testing conditions. Light chopping experiments were done with a solid junction Cu<sub>2</sub>O-Au electrode. Typically, Cu<sub>2</sub>O was electrochemically deposited onto FTO glass according to reported procedures.<sup>41</sup> A 30 nm film of Au was then sputter deposited onto the Cu<sub>2</sub>O layer in a procedure similar to the micromotor particle synthesis. The open circuit voltage was measured with potentiostat connecting to the solid junction

electrode by the Au surface and the substrate FTO surface. J-V curves were measured in a similar solid junction setup at a scan rate of 20 mV/s. A 100 mW/cm<sup>2</sup> Xe lamp and NuVant EZStat potentiostat were used in all the electrochemical experiments.
